# Supplementary material for: Selective enhancement of human stem cell proliferation by mussel inspired surface coating
Source: Royal Society of Chemistry journal article supplement (doi:10.1039/c6ra11173d), 2016-01-01
Supplement: c6ra11173d1.pdf [file c6ra11173d1.pdf]

## Supplementary information

# Selective enhancement of human stem cell proliferation by mussel inspired surface coating

Xiumei Jiang<sup>a,b</sup>, Yanfang Li<sup>b</sup>, Ying Liu<sup>a</sup>, Chunying Chen<sup>a\*</sup>, Menglin Chen<sup>b\*</sup>

<sup>a</sup>CAS Key Laboratory for Biomedical Effects of Nanomaterials and Nanosafety & CAS Center for Excellence in Nanoscience, National Center for Nanoscience and Technology, Beijing 100190, China

<sup>b</sup>Interdisciplinary Nanoscience Center (iNANO), Aarhus University, DK-8000 Aarhus C, Denmark

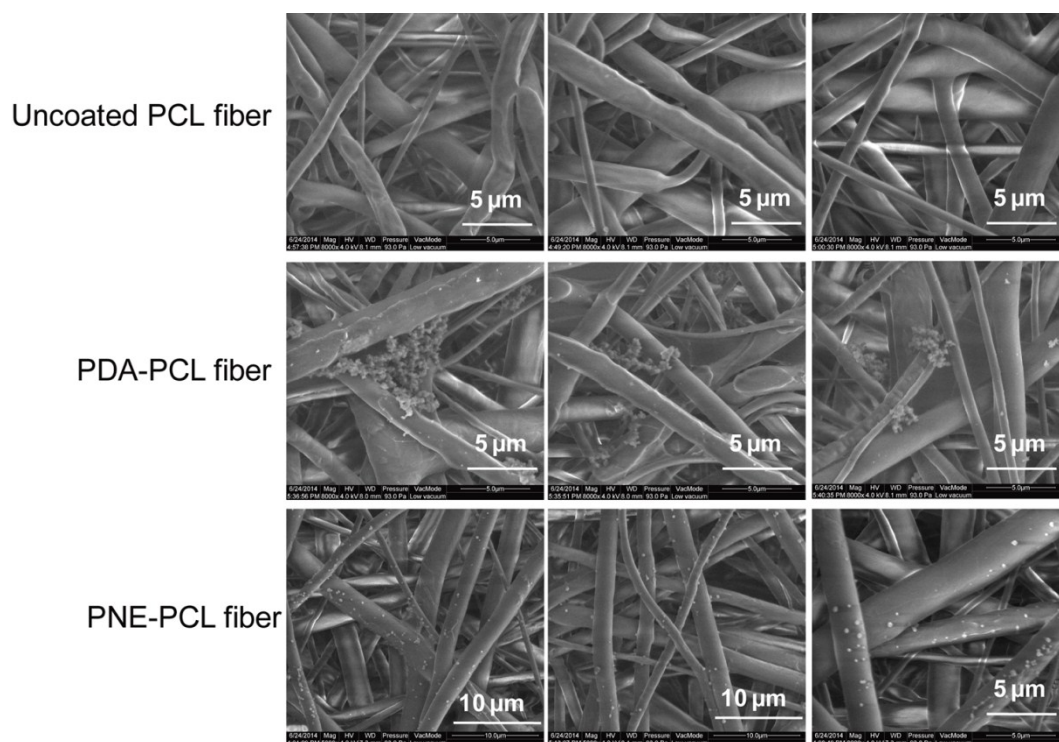

Figure S1, Surface morphology characterization of PCL fiber, PDA-PCL fiber and PNE-PCL fiber with ESEM.

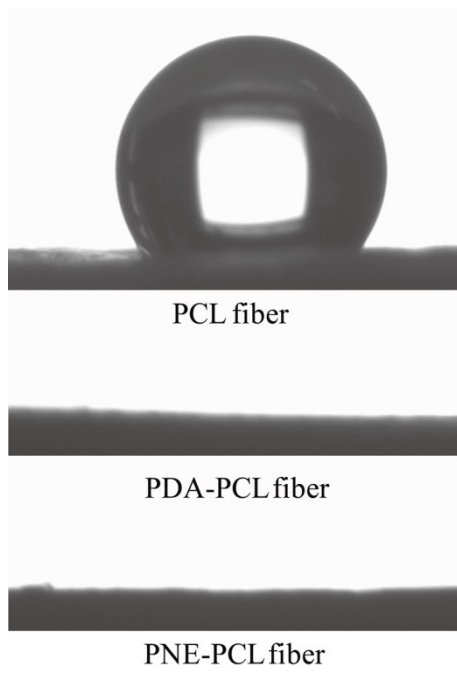

Figure S2, Contact angle of PCL fiber before and after PDA or PNE surface coating.

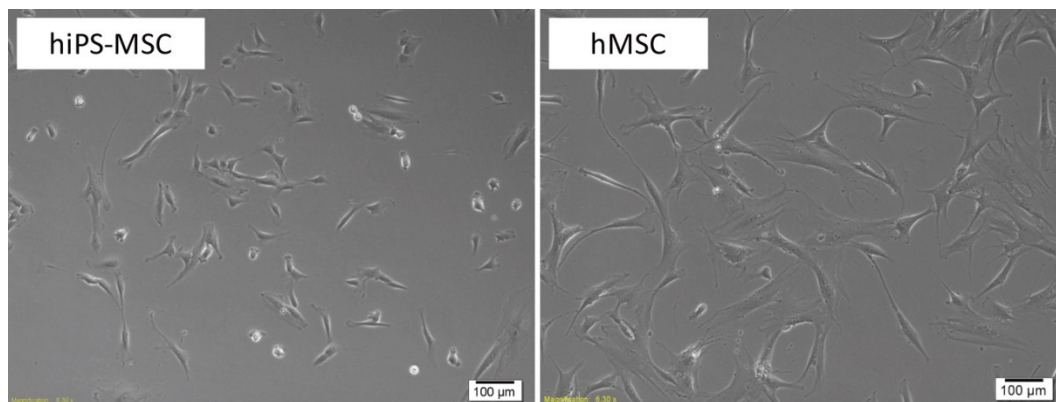

Figure S3 Cell morphology of hiPS-MSC and hMSC cells cultured on tissue culture plate.

Table S1 Time-dependent surface coating of PDA or PNE measured by XPS.

|       | PCL   |     |       | PDA-PCL |      |       | PNE-PCL |      |       |
|-------|-------|-----|-------|---------|------|-------|---------|------|-------|
|       | C1s   | N1s | O1s   | C1s     | N1s  | O1s   | C1s     | N1s  | O1s   |
| 0.5 h | 78.01 | 0   | 21.99 | 73.22   | 4.65 | 22.12 | 76.09   | 1.86 | 22.05 |
| 1 h   | 78.01 | 0   | 21.99 | 73.36   | 4.97 | 21.67 | 75.69   | 1.71 | 22.6  |
| 3 h   | 78.01 | 0   | 21.99 | 73.95   | 5.19 | 20.86 | 75.8    | 1.81 | 22.39 |
| 6 h   | 78.01 | 0   | 21.99 | 72.4    | 5.48 | 22.07 | 73.84   | 2.8  | 23.36 |
| 17 h  | 78.01 | 0   | 21.99 | 71.99   | 6.23 | 21.78 | 70.99   | 4.39 | 24.62 |
